# Supplementary material for: Preventive effect of sensorimotor exercise and resistance training on chemotherapy-induced peripheral neuropathy: a randomised-controlled trial
Source: PubMed Central journal article supplement (PMC8476560; doi:10.1038/s41416-021-01471-1), 2021-07-05
Supplement: 41416_2021_1471_MOESM2_ESM.pdf [file 41416_2021_1471_MOESM2_ESM.pdf]

**Table S1a.** Sensorimotor exercise training: Prescribed and actual exercise dose and adherence outcomes.

|                              | PRESCRIBED                                                                                                                                                                                                                                                                                                                                                                                              | ACTUAL                                                                                  |                          |
|------------------------------|---------------------------------------------------------------------------------------------------------------------------------------------------------------------------------------------------------------------------------------------------------------------------------------------------------------------------------------------------------------------------------------------------------|-----------------------------------------------------------------------------------------|--------------------------|
| <b>F</b> <sub>REQUENCY</sub> | 3x/week                                                                                                                                                                                                                                                                                                                                                                                                 | ▪ Attended training weeks [% of planned length]                                         | 68.1 ± 29.3              |
|                              |                                                                                                                                                                                                                                                                                                                                                                                                         | ▪ Attended training sessions [% of planned sessions] [o/w supervised]                   | 53.3 ± 27.5 [4.6 ± 12.2] |
|                              |                                                                                                                                                                                                                                                                                                                                                                                                         | ▪ Treatment interruption [n per patient] <sup>[1]</sup>                                 | 1.5 ± 1.6                |
|                              |                                                                                                                                                                                                                                                                                                                                                                                                         | ▪ Length of treatment interruption [weeks]                                              | 2.5 ± 1.4                |
|                              |                                                                                                                                                                                                                                                                                                                                                                                                         | ▪ Permanent treatment discontinuation [n] <sup>[2]</sup>                                | 11 (23%)                 |
| <b>I</b> <sub>NTENSITY</sub> | various difficulties<br>progression: based on individual perception (see Figure EX1 for details)                                                                                                                                                                                                                                                                                                        | ▪ Missed progress [% of attended training sessions] <sup>[3]</sup>                      | 19.1 ± 14.7              |
|                              |                                                                                                                                                                                                                                                                                                                                                                                                         | ▪ Sessions requiring dose reduction(s) [% of attended training sessions] <sup>[4]</sup> | 23.9 ± 15                |
| <b>T</b> <sub>IME</sub>      | total length according to CHT regime plus 3 weeks<br>[until posto]<br>3x35 min/week                                                                                                                                                                                                                                                                                                                     | ▪ Total length [weeks]                                                                  | 20.7 ± 4.7               |
|                              |                                                                                                                                                                                                                                                                                                                                                                                                         | ▪ Total training duration per week [min]                                                | 81.5 ± 21.7              |
|                              |                                                                                                                                                                                                                                                                                                                                                                                                         | ▪ Number of exercises per session [mean]                                                | 7.8 ± 1.9                |
| <b>T</b> <sub>YPE</sub>      | <p style="text-align: center;"><b>Sensorimotor exercise training</b></p> STATIC AND DYNAMIC (16%) EXERCISES IN UPRIGHT POSITION FOR IMPROVING POSTURAL CONTROL/BALANCE. EXERCISES WERE PROGRESSIVELY DESIGNED AND VARIED REGARDING BASE OF SUPPORT, SURFACE, HEAD POSITION, VISUAL CONTROL, AND ADDITIONAL TASKS. EACH EXERCISE WAS PERFORMED 3×30 SECONDS WITH AT LEAST 30 SECONDS PAUSE BETWEEN SETS. |                                                                                         |                          |

The adherence outcomes are presented as mean ± SD (unless otherwise indicated) and are based on the data of 48 patients. Four patients out of 52 (8%) did not start their assigned sensorimotor exercise training due to: study exclusion (n=3, see flow-chart), an unplanned inpatient admission at the beginning of the study made the patient feel that the additional training program was too much (n=1). Abbreviations and additional explanations/definitions: <sup>[1]</sup> missing at least three consecutive sessions (Nilsen et al. 2018 *Med Sci Sports Exerc*); <sup>[2]</sup> permanent discontinuation of exercise intervention within the first two thirds of the planned duration; <sup>[3]</sup> patients indicated that at least one of the performed exercises was very easy or easy (NRS 1 or 2) without increasing the difficulty in the following training sessions (i.e. using at least one training card with a higher number); <sup>[4]</sup> patients indicated that the average dose/difficulty of a training session was reduced, i.e. the mean value of the card numbers has decreased from one training session to the next.
