# Supplementary material for: Preventive effect of sensorimotor exercise and resistance training on chemotherapy-induced peripheral neuropathy: a randomised-controlled trial
Source: PubMed Central journal article supplement (PMC8476560; doi:10.1038/s41416-021-01471-1), 2021-07-05
Supplement: 41416_2021_1471_MOESM3_ESM.pdf [file 41416_2021_1471_MOESM3_ESM.pdf]

**Table S1b.** Resistance training: Prescribed and actual exercise dose and adherence outcomes.

|                               | PRESCRIBED                                                                                                                                                                                                                                                                                                                                                                                      |                                   | ACTUAL                                                                                                                                                                                                                                                                                                                                                                                                      |                                                |
|-------------------------------|-------------------------------------------------------------------------------------------------------------------------------------------------------------------------------------------------------------------------------------------------------------------------------------------------------------------------------------------------------------------------------------------------|-----------------------------------|-------------------------------------------------------------------------------------------------------------------------------------------------------------------------------------------------------------------------------------------------------------------------------------------------------------------------------------------------------------------------------------------------------------|------------------------------------------------|
|                               | SUPERVISED                                                                                                                                                                                                                                                                                                                                                                                      | HOME-BASED                        | SUPERVISED                                                                                                                                                                                                                                                                                                                                                                                                  | HOME-BASED                                     |
| <b>F</b> <sub>FREQUENCY</sub> | 2x/week                                                                                                                                                                                                                                                                                                                                                                                         | 1x/week                           | <ul style="list-style-type: none"> <li>▪ Attended training weeks [% of planned length] 55.1 ± 28.4</li> <li>▪ Attended training sessions [% of planned sessions] 42.7 ± 25.7</li> <li>▪ Treatment interruption [n per patient] <sup>[1]</sup> 2.0 ± 1.9</li> <li>▪ Length of treatment interruption [weeks] 2.3 ± 1.0</li> <li>▪ Permanent treatment discontinuation [n] <sup>[2]</sup> 10 (19%)</li> </ul> |                                                |
| <b>I</b> <sub>INTENSITY</sub> | start at 70-80%1RM progression: 3×12 repetitions in three consecutive training sessions                                                                                                                                                                                                                                                                                                         | RPE 14-16                         | <ul style="list-style-type: none"> <li>▪ Mean intensity over time 68.4 ± 15.4 <sup>[3]</sup></li> <li>▪ Training weight increases [%] <sup>[5]</sup> 19.9 ± 13.4</li> <li>▪ Training weight reductions [%] <sup>[5]</sup> 9.7 ± 10.9</li> <li>▪ Missed progress <sup>[6]</sup> 70.3 ± 26.9</li> </ul>                                                                                                       | 14.4 ± 1.7 <sup>[4]</sup><br>n/a<br>n/a<br>n/a |
| <b>T</b> <sub>IME</sub>       | total length according to CHT regime plus 3 weeks [until posto]<br>2x 45 min/week [8 exercises/session]                                                                                                                                                                                                                                                                                         | 15 min/week [3 exercises/session] | <ul style="list-style-type: none"> <li>▪ Total length [weeks] 20.3 ± 5.5</li> <li>▪ Total training duration per week [min] 68.6 ± 17.8</li> <li>▪ Numbers of exercises per session [median] 8.3 ± 1.4</li> </ul>                                                                                                                                                                                            | 17 ± 6.1<br>2.8 ± 0.4                          |
| <b>T</b> <sub>YPE</sub>       | <b>Supervised machine-based resistance training + home-based core stability exercises</b><br>SUPERVISED: LEG PRESS, KNEE EXTENSION AND FLEXION, ROWING, LATERAL PULL DOWN, SHOULDER INTERNAL AND EXTERNAL ROTATION, BUTTERFLY, BUTTERFLY REVERSE<br>HOME-BASED: 15 DIFFERENT CORE STABILITY EXERCISES IN VARIOUS POSITIONS: SUPINE POSITION, PRONE POSITION, QUADRUPED POSITION, PLANK POSITION |                                   |                                                                                                                                                                                                                                                                                                                                                                                                             |                                                |

The adherence outcomes are presented as mean ± SD (unless otherwise indicated) and are based on the data of 54 patients. Seven patients out of 60 (12%) did not start their assigned resistance training program due to: time constraints (n=3), study exclusion (see flow-chart, n=2), medical contraindication (port thrombosis, n=1), training contents did not please (n=1). Abbreviations and additional explanations/definitions: <sup>[1]</sup> missing at least three consecutive sessions (Nilsen et al. 2018 Med Sci Sports Exerc); <sup>[2]</sup> permanent discontinuation of exercise intervention within the first two thirds of the planned duration; <sup>[3]</sup> %1RM [percent of one repetition maximum]; <sup>[4]</sup> BORG Rating of Perceived Exertion (RPE); <sup>[5]</sup> number of training weight increases/reductions per exercise (compared to the previous training session) in relation to the total number of exercises during the intervention period; <sup>[6]</sup> training weight was not increased after patient moved the target weight in 3×12 repetitions in three consecutive training sessions.
