# Supplementary material for: Preventive effect of sensorimotor exercise and resistance training on chemotherapy-induced peripheral neuropathy: a randomised-controlled trial
Source: PubMed Central journal article supplement (PMC8476560; doi:10.1038/s41416-021-01471-1), 2021-07-05
Supplement: 41416_2021_1471_MOESM4_ESM.pdf [file 41416_2021_1471_MOESM4_ESM.pdf]

**Table S2.** Detailed information of cancer stages according to UICC [n (%)].

|          | <b>Total</b> | <b>SMT</b> | <b>RT</b> | <b>UC</b> |
|----------|--------------|------------|-----------|-----------|
| 1        | 8 (5%)       | 4 (8%)     | 2 (4%)    | 2 (4%)    |
| 1A       | 32 (20%)     | 9 (18%)    | 9 (16%)   | 14 (25%)  |
| 1B       | 1 (1%)       | 1 (2%)     |           |           |
| 1C       | 1 (1%)       |            | 1 (2%)    |           |
| 2        | 2 (1%)       |            | 1 (2%)    | 1 (2%)    |
| 2A       | 33 (20%)     | 7 (14%)    | 14 (25%)  | 12 (21%)  |
| 2B       | 23 (14%)     | 9 (18%)    | 7 (12%)   | 7 (12%)   |
| 3        | 7 (4%)       | 3 (6%)     | 3 (5%)    | 1 (2%)    |
| 3A       | 15 (9%)      | 4 (8%)     | 5 (9%)    | 6 (11%)   |
| 3B       | 6 (4%)       | 1 (2%)     | 3 (5%)    | 2 (4%)    |
| 3C       | 5 (3%)       | 1 (2%)     | 3 (5%)    | 1 (2%)    |
| 4        | 14 (9%)      | 4 (8%)     | 4 (7%)    | 6 (11%)   |
| 4A       | 5 (3%)       |            | 2 (4%)    | 3 (5%)    |
| 4B       | 3 (2%)       | 2 (4%)     |           | 1 (2%)    |
| WHO II°  | 2 (1%)       |            | 2 (4%)    |           |
| WHO III° | 1 (1%)       |            | 1 (2%)    |           |
| unknown  | 5 (3%)       | 4 (8%)     |           | 1 (2%)    |
