# Supplementary material for: Preventive effect of sensorimotor exercise and resistance training on chemotherapy-induced peripheral neuropathy: a randomised-controlled trial
Source: PubMed Central journal article supplement (PMC8476560; doi:10.1038/s41416-021-01471-1), 2021-07-05
Supplement: 41416_2021_1471_MOESM5_ESM.pdf [file 41416_2021_1471_MOESM5_ESM.pdf]

**Table S3.** Reasons for missed training sessions.

|                                                                 | <b>SMT</b>  | <b>RT</b>   |
|-----------------------------------------------------------------|-------------|-------------|
| <b>Somatic side effects of anticancer treatment [%]</b>         | <b>27.6</b> | <b>34.4</b> |
| - nausea / vomiting / diarrhoea                                 | 11.3        | 14.5        |
| - pain                                                          | 9.9         | 7.8         |
| - thrombosis                                                    | 4.6         | 2.3         |
| - skin reactions                                                | 0.9         | 2.5         |
| - hematopoietic disturbances                                    | 0.2         | 1.7         |
| - cardiac signs                                                 | 0.0         | 0.3         |
| - visual impairments                                            | 0.0         | 1.2         |
| - CIPN                                                          | 0.0         | 0.5         |
| - not further specified                                         | 0.7         | 3.6         |
| <b>Biopsychosocial side effects of anticancer treatment [%]</b> | <b>20.2</b> | <b>14.4</b> |
| - fatigue                                                       | 14.9        | 7.5         |
| - feeling unwell                                                | 5.1         | 6.4         |
| - mental constrains                                             | 0.2         | 0.5         |
| <b>Other medical issues related to anticancer treatment [%]</b> | <b>2.1</b>  | <b>4.1</b>  |
| - complications with subcutaneous port                          | 1.4         | 2.7         |
| - hospitalization / post-operation                              | 0.7         | 1.4         |
| <b>Others</b>                                                   | <b>50.1</b> | <b>47.1</b> |
| - time constraints                                              | 25.8        | 23.2        |
| - motivation                                                    | 11.3        | 5.3         |
| - infection                                                     | 7.4         | 3.6         |
| - organisational reasons                                        | 5.1         | 12.5        |
| - orthopaedic contraindications                                 | 0.5         | 1.9         |
| - not further specified                                         | 0.0         | 0.6         |
