# Supplementary material for: Preventive effect of sensorimotor exercise and resistance training on chemotherapy-induced peripheral neuropathy: a randomised-controlled trial
Source: PubMed Central journal article supplement (PMC8476560; doi:10.1038/s41416-021-01471-1), 2021-07-05
Supplement: 41416_2021_1471_MOESM6_ESM.pdf [file 41416_2021_1471_MOESM6_ESM.pdf]

**Table S4.** Patient characteristics and significant baseline differences between adherent and non-adherent exercisers.

|                                                                  | Adh. EX         | Non-adh. EX     | p-value |
|------------------------------------------------------------------|-----------------|-----------------|---------|
| <b>Patient characteristics</b>                                   |                 |                 |         |
| N                                                                | 35              | 71              | -       |
| Sex [f:m, n]                                                     | 27:8            | 62:9            | .179    |
| Age [mean $\pm$ SD]                                              | 52.1 $\pm$ 10.9 | 52.9 $\pm$ 11.5 | .752    |
| BMI [mean $\pm$ SD]                                              | 26 $\pm$ 5.1    | 26.7 $\pm$ 5.2  | .573    |
| Married [n (%)]                                                  | 29 (74%)        | 52 (85%)        | .245    |
| Completed university [n (%)]                                     | 16 (30%)        | 21 (47%)        | .088    |
| Breast cancer [n (%)]                                            | 25 (71%)        | 52 (73%)        | .844    |
| Stage III/IV [n (%)]                                             | 12 (36%)        | 24 (35%)        | .875    |
| <b>EORTC QLQ C30 [baseline values, mean <math>\pm</math> SD]</b> |                 |                 |         |
| Physical functioning                                             | 91.8 $\pm$ 15.4 | 88.1 $\pm$ 13.6 | .024 *  |
| Cognitive functioning                                            | 88.2 $\pm$ 21.1 | 78.6 $\pm$ 20.9 | .007 *  |
| Fatigue                                                          | 21.4 $\pm$ 23.7 | 36.0 $\pm$ 26.2 | .004 *  |
| Insomnia                                                         | 24.5 $\pm$ 28.8 | 43.8 $\pm$ 34.3 | .006 *  |

We tested all primary and secondary outcome variables, but only the significant differences are shown besides patient characteristics. Abbreviations: ahd., adherent; EX, exercisers.
