# Supplementary material for: Preventive effect of sensorimotor exercise and resistance training on chemotherapy-induced peripheral neuropathy: a randomised-controlled trial
Source: PubMed Central journal article supplement (PMC8476560; doi:10.1038/s41416-021-01471-1), 2021-07-05
Supplement: 41416_2021_1471_MOESM7_ESM.pdf [file 41416_2021_1471_MOESM7_ESM.pdf]

**Table S5.** Adverse events related to the exercise programs.

|                                            | SMT                    | RT                     |
|--------------------------------------------|------------------------|------------------------|
| Patients reporting at least one AE [n (%)] | 10 (21% <sup>1</sup> ) | 13 (25% <sup>1</sup> ) |
| <b>Adverse events</b>                      |                        |                        |
| Pain                                       |                        |                        |
| ▪ after 1RM test                           | -                      | 2                      |
| ▪ musculoskeletal                          | 4                      | 14                     |
| ▪ other                                    | 1                      | 3                      |
| Fatigue                                    | 2                      | 4                      |
| Dizziness                                  | 9                      | 2                      |

**Note:** <sup>1</sup> The percentage is based on the number of patients who ever exercised during the intervention period (SMT n=48; RT n=53).
