# Supplementary material for: Preventive effect of sensorimotor exercise and resistance training on chemotherapy-induced peripheral neuropathy: a randomised-controlled trial
Source: PubMed Central journal article supplement (PMC8476560; doi:10.1038/s41416-021-01471-1), 2021-07-05
Supplement: 41416_2021_1471_MOESM9_ESM.pdf [file 41416_2021_1471_MOESM9_ESM.pdf]

**Table S7.** Number of falls.

|             | <b>pre</b> | <b>pre-post<sub>0</sub></b> | <b>post<sub>0</sub>-post<sub>3</sub><sup>+</sup></b> | <b>post<sub>3</sub>-post<sub>6</sub><sup>+</sup></b> |
|-------------|------------|-----------------------------|------------------------------------------------------|------------------------------------------------------|
| SMT [n (%)] | 2 (4%)     | 5 (11%)                     | 4 (10%)                                              | 5 (12%)                                              |
| RT [n (%)]  | 6 (11%)    | 2 (4%)                      | 1 (2%)                                               | 1 (2%)                                               |
| UC [n (%)]  | 4 (7%)     | 6 (11%)                     | 3 (6%)                                               | 4 (9%)                                               |
| p-value     | .485       | .290                        | .280                                                 | .047                                                 |

Table S7 shows the number of falls according to different time periods within the PIC study. The first time period (pre) refers to the 12 months prior to study inclusion. **Note:** The follow up time-periods marked with a “+” have high numbers of missing values (post<sub>0</sub>-post<sub>3</sub>: n=18, post<sub>3</sub>-post<sub>6</sub>: n=42), therefore p-values should be interpreted with caution.
