# Supplementary material for: Preventive effect of sensorimotor exercise and resistance training on chemotherapy-induced peripheral neuropathy: a randomised-controlled trial
Source: PubMed Central journal article supplement (PMC8476560; doi:10.1038/s41416-021-01471-1), 2021-07-05
Supplement: 41416_2021_1471_MOESM10_ESM.pdf [file 41416_2021_1471_MOESM10_ESM.pdf]

**Table S8.** Information on chemotherapy dose modifications, early termination and concomitant CIPN treatment and prevention measures (based on the ITT study sample).

|                                                         | Total     | SMT      | RT       | UC       | <i>p value</i> |
|---------------------------------------------------------|-----------|----------|----------|----------|----------------|
| <b>CHT dose modifications</b>                           | 49 (32%)  | 12 (26%) | 22 (40%) | 15 (28%) | .239           |
| - neuropathy                                            | 24 (15%)  | 8 (16%)  | 9 (15%)  | 7 (13%)  | .917           |
| - hematopoietic disturbances                            | 8 (5%)    | 2 (4%)   | 5 (8%)   | 1 (2%)   |                |
| - skin reactions                                        | 5 (3%)    |          | 2 (3%)   | 3 (6%)   |                |
| - obstipation/diarrhea                                  | 5 (3%)    |          | 4 (7%)   | 1 (2%)   |                |
| - mucositis                                             | 4 (2%)    |          | 4 (7%)   |          |                |
| - chemotherapy intolerance symptoms                     | 3 (2%)    | 1 (2%)   |          | 2 (4%)   |                |
| - arthralgia/myalgia                                    | 2 (1%)    |          | 1 (2%)   | 1 (2%)   |                |
| - cardiac signs or symptoms                             | 1 (1%)    |          | 1 (2%)   |          |                |
| - thrombopenia                                          | 1 (1%)    | 1 (2%)   |          |          |                |
| - edema                                                 | 1 (1%)    | 1 (2%)   |          |          |                |
| - liver reactions                                       | 1 (1%)    |          |          | 1 (2%)   |                |
| - nausea/vomiting                                       | 1 (1%)    |          | 1 (2%)   |          |                |
| - difficulty swallowing                                 | 1 (1%)    | 1 (2%)   |          |          |                |
| - psychological strain                                  | 1 (1%)    |          | 1 (2%)   |          |                |
| - reduced overall condition                             | 1 (1%)    |          | 1 (2%)   |          |                |
| - extravasate                                           | 1 (1%)    |          | 1 (2%)   |          |                |
| - patient's wish                                        | 1 (1%)    |          |          | 1 (2%)   |                |
| - multiple reasons                                      | 3 (2%)    | 2 (4%)   |          | 1 (2%)   |                |
| - not known                                             | 2 (1%)    |          | 1 (2%)   | 1 (2%)   |                |
| <b>CHT early termination</b>                            | 33 (21%)  | 10 (21%) | 11 (20%) | 12 (22%) | .960           |
| - neuropathy                                            | 9 (6%)    | 4 (9%)   | 2 (4%)   | 3 (6%)   | .573           |
| - patient's wish                                        | 4 (3%)    | 1 (2%)   | 2 (4%)   | 1 (2%)   |                |
| - skin reactions                                        | 2 (1%)    | 1 (2%)   | 1 (2%)   |          |                |
| - hematopoietic disturbances                            | 1 (1%)    |          |          | 1 (2%)   |                |
| - cardiac signs or symptoms                             | 1 (1%)    |          |          | 1 (2%)   |                |
| - thrombopenia                                          | 1 (1%)    |          |          | 1 (2%)   |                |
| - haemoptysis                                           | 1 (1%)    |          |          | 1 (2%)   |                |
| - liver reactions                                       | 1 (1%)    |          |          | 1 (2%)   |                |
| - mucositis                                             | 1 (1%)    |          | 1 (2%)   |          |                |
| - obstipation/diarrhea                                  | 1 (1%)    |          | 1 (2%)   |          |                |
| - arthralgia/myalgia                                    | 1 (1%)    |          |          | 1 (2%)   |                |
| - progressive disease                                   | 1 (1%)    | 1 (2%)   |          |          |                |
| - multiple reasons                                      | 5 (3%)    | 3 (6%)   | 2 (4%)   |          |                |
| - not known                                             | 4 (3%)    |          | 2 (4%)   | 2 (4%)   |                |
| <b>Concomitant CIPN treatment / prevention measures</b> |           |          |          |          |                |
| - CIPN specific medication                              | 16 (10%)  | 6 (12%)  | 5 (9%)   | 5 (9%)   | .792           |
| - pain oil                                              | 5 (3%)    | 1 (2%)   | 2 (4%)   | 2 (4%)   |                |
| - painkillers                                           | 2 (1%)    | 1 (2%)   | 1 (2%)   |          |                |
| - Vitamin B/D                                           | 103 (63%) | 32 (65%) | 39 (68%) | 32 (56%) | .371           |
| - food supplements                                      | 27 (17%)  | 10 (20%) | 12 (21%) | 5 (9%)   |                |
| - ice                                                   | 66 (40%)  | 19 (39%) | 23 (40%) | 24 (42%) | .941           |
| - massages                                              | 56 (34%)  | 15 (31%) | 19 (33%) | 22 (39%) | .675           |
| - general mobility exercises                            | 14 (9%)   | 4 (8%)   | 5 (9%)   | 5 (9%)   |                |
| - (Kneipp) bathing                                      | 7 (4%)    | 2 (4%)   | 4 (7%)   | 1 (2%)   |                |
| - handworks/handcrafts                                  | 7 (4%)    | 1 (2%)   | 3 (5%)   | 3 (5%)   |                |
| - acupuncture                                           | 4 (2%)    | 2 (4%)   | 2 (4%)   |          |                |
| - electrostimulation/TENS                               | 1 (1%)    |          | 1 (2%)   |          |                |
| - vibration                                             | 1 (1%)    |          | 1 (2%)   |          |                |
| - yoga                                                  | 1 (1%)    |          | 1 (2%)   |          |                |
| - others                                                | 6 (4%)    |          | 6 (11%)  |          |                |
